# Supplementary material for: Effects of Three Music Therapy Interventions on the Verbal Expressions of Children With Autism Spectrum Disorder: A Combined Single-Subject Design
Source: Frontiers journal article supplement (doi:10.3389/fpsyg.2022.819473), 2022-03-04
Supplement: Data_Sheet_1.pdf [file Data_Sheet_1.pdf]

## Social Validity Questionnaires

### Teacher Questionnaire

Please rate this music-ABA intervention technique from 1-8 with, 1 corresponding to “not at all acceptable” and 8 being “very acceptable”. Thank you ☺

1. How acceptable do you find this treatment to be for the student’s verbal behavior?

|                          |       |       |                          |       |                    |
|--------------------------|-------|-------|--------------------------|-------|--------------------|
| _____                    | _____ | _____ | _____                    | _____ | _____              |
| _____                    |       |       |                          |       |                    |
| Not at all<br>acceptable |       |       | moderately<br>acceptable |       | very<br>acceptable |

2. How willing would you be to carry out this procedure yourself if you had to change the student’s verbal behavior?

|                          |       |       |                          |       |                    |
|--------------------------|-------|-------|--------------------------|-------|--------------------|
| _____                    | _____ | _____ | _____                    | _____ | _____              |
| _____                    |       |       |                          |       |                    |
| Not at all<br>acceptable |       |       | moderately<br>acceptable |       | very<br>acceptable |

3. How much do you like the procedures used in this treatment?

|                          |       |       |                          |       |                    |
|--------------------------|-------|-------|--------------------------|-------|--------------------|
| _____                    | _____ | _____ | _____                    | _____ | _____              |
| _____                    |       |       |                          |       |                    |
| Not at all<br>acceptable |       |       | moderately<br>acceptable |       | very<br>acceptable |

4. How likely is this treatment to make permanent improvements in the student?

|                          |       |       |                          |       |                    |
|--------------------------|-------|-------|--------------------------|-------|--------------------|
| _____                    | _____ | _____ | _____                    | _____ | _____              |
| _____                    |       |       |                          |       |                    |
| Not at all<br>acceptable |       |       | moderately<br>acceptable |       | very<br>acceptable |

5. To what extent or undesirable side effects likely to result from this treatment?

|                          |       |       |                          |       |                    |
|--------------------------|-------|-------|--------------------------|-------|--------------------|
| _____                    | _____ | _____ | _____                    | _____ | _____              |
| _____                    |       |       |                          |       |                    |
| Not at all<br>acceptable |       |       | moderately<br>acceptable |       | very<br>acceptable |

6. Overall, what is your general reaction to this form of treatment?

|                          |       |       |                          |       |                    |
|--------------------------|-------|-------|--------------------------|-------|--------------------|
| _____                    | _____ | _____ | _____                    | _____ | _____              |
| Not at all<br>acceptable |       |       | moderately<br>acceptable |       | very<br>acceptable |

7. I would suggest the use of this intervention to other special education or music teachers

|                          |       |       |                          |       |                    |
|--------------------------|-------|-------|--------------------------|-------|--------------------|
| _____                    | _____ | _____ | _____                    | _____ | _____              |
| Not at all<br>acceptable |       |       | moderately<br>acceptable |       | very<br>acceptable |

8. Most special education or music teachers would find this intervention suitable for problem behaviors.

|                          |       |       |                          |       |                    |
|--------------------------|-------|-------|--------------------------|-------|--------------------|
| _____                    | _____ | _____ | _____                    | _____ | _____              |
| Not at all<br>acceptable |       |       | moderately<br>acceptable |       | very<br>acceptable |

9. I would be willing to use this intervention in the special education setting

|                          |       |       |                          |       |                    |
|--------------------------|-------|-------|--------------------------|-------|--------------------|
| _____                    | _____ | _____ | _____                    | _____ | _____              |
| Not at all<br>acceptable |       |       | moderately<br>acceptable |       | very<br>acceptable |

10. This intervention would be appropriate for a variety of children

|                          |       |       |                          |       |                    |
|--------------------------|-------|-------|--------------------------|-------|--------------------|
| _____                    | _____ | _____ | _____                    | _____ | _____              |
| Not at all<br>acceptable |       |       | moderately<br>acceptable |       | very<br>acceptable |

11. Overall, this intervention was beneficial for the child

|                          |       |       |                          |       |                    |
|--------------------------|-------|-------|--------------------------|-------|--------------------|
| _____                    | _____ | _____ | _____                    | _____ | _____              |
| Not at all<br>acceptable |       |       | moderately<br>acceptable |       | very<br>acceptable |

12. How important do you think it is that you child's school incorporate this intervention into their curriculum?

|            |       |       |            |       |       |
|------------|-------|-------|------------|-------|-------|
| _____      | _____ | _____ | _____      | _____ | _____ |
| Not at all |       |       | moderately |       | very  |

acceptable

acceptable

acceptable

Thank you ☺

## **Appendix B**

### **A. Parent Questionnaire**

How old is your child? \_\_\_\_\_

What grade is your child in? \_\_\_\_\_

What is your child's IQ range? \_\_\_\_\_

Does the child have any speech problems?

---

Does your child benefit from speech therapy?

Does the child have any visual problems? \_\_\_\_\_

If so how severe are they? \_\_\_\_\_

Does the child have hearing problems? \_\_\_\_\_ If so, how severe are his hearing problems?

---

Is the child receiving any special school services such as special education, reading services, tutoring etc.?  
If yes, can you please mention them? \_\_\_\_\_

---

---

What is the main language spoken at home? \_\_\_\_\_

If it is a language other than English, describe the extent to which it is spoken

---

What is the child's primary language? \_\_\_\_\_

Does your child have educational difficulties? \_\_\_\_\_ If so, in what?

---

Has your child had previous experience in music therapy? \_\_\_\_\_
